# Supplementary material for: Removal of Diclofenac, Paracetamol, and Carbamazepine from Model Aqueous Solutions by Magnetic Sol–Gel Encapsulated Horseradish Peroxidase and Lignin Peroxidase Composites
Source: MDPI journal article supplement (doi:10.3390/nano10020282), 2020-02-07
Supplement: s1 [file s1]

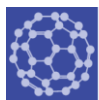

*Supplementary Material*

# Removal of Diclofenac, Paracetamol, and Carbamazepine from Model Aqueous Solutions by Magnetic Sol–Gel Encapsulated Horseradish Peroxidase and Lignin Peroxidase Composites

Ievgen V. Pylypchuk <sup>1,2,\*</sup>, Geoffrey Daniel <sup>3</sup>, Vadim G. Kessler <sup>1</sup>, and Gulaim A. Seisenbaeva <sup>1,\*</sup>

<sup>1</sup> Department of Molecular Sciences, Swedish University of Agricultural Sciences, 750 07 Uppsala, Sweden; vadim.kessler@slu.se

<sup>2</sup> Chuiko Institute of Surface Chemistry of National Academy of Sciences of Ukraine, 17, General Naumov Street, 03164 Kyiv, Ukraine

<sup>3</sup> Department of Biomaterials and Technology, Swedish University of Agricultural Sciences, Box 7008, 750 07 Uppsala, Sweden; geoffrey.daniel@slu.se

\* Correspondence: ievgenpy@kth.se (I.V.P.); gulaim.seisenbaeva@slu.se (G.A.S.)

Received: 28 December 2019; Accepted: 01 February 2020; Published: 7 February 2020

## Supplementary Figures

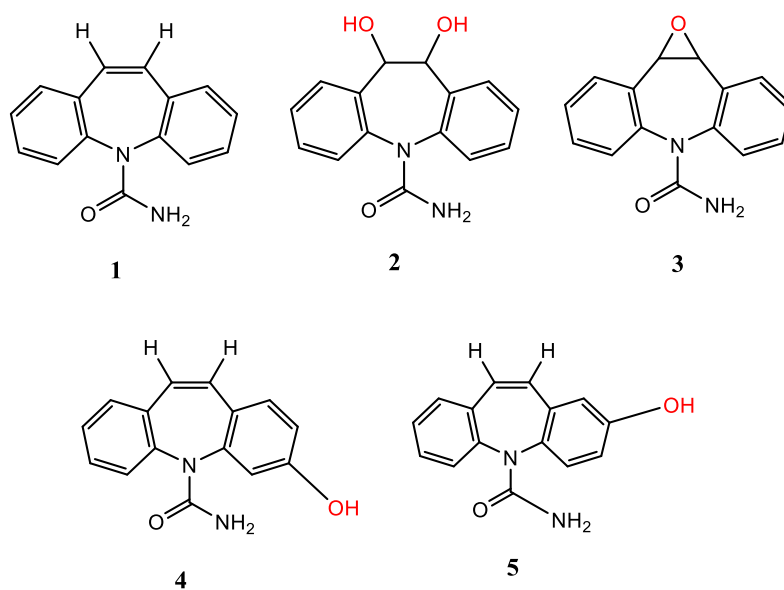

**Scheme S1.** Chemical formula for CBZ (1) and its metabolites after enzymatic degradation (2-5).

## Scanning electron microscopy (SEM).

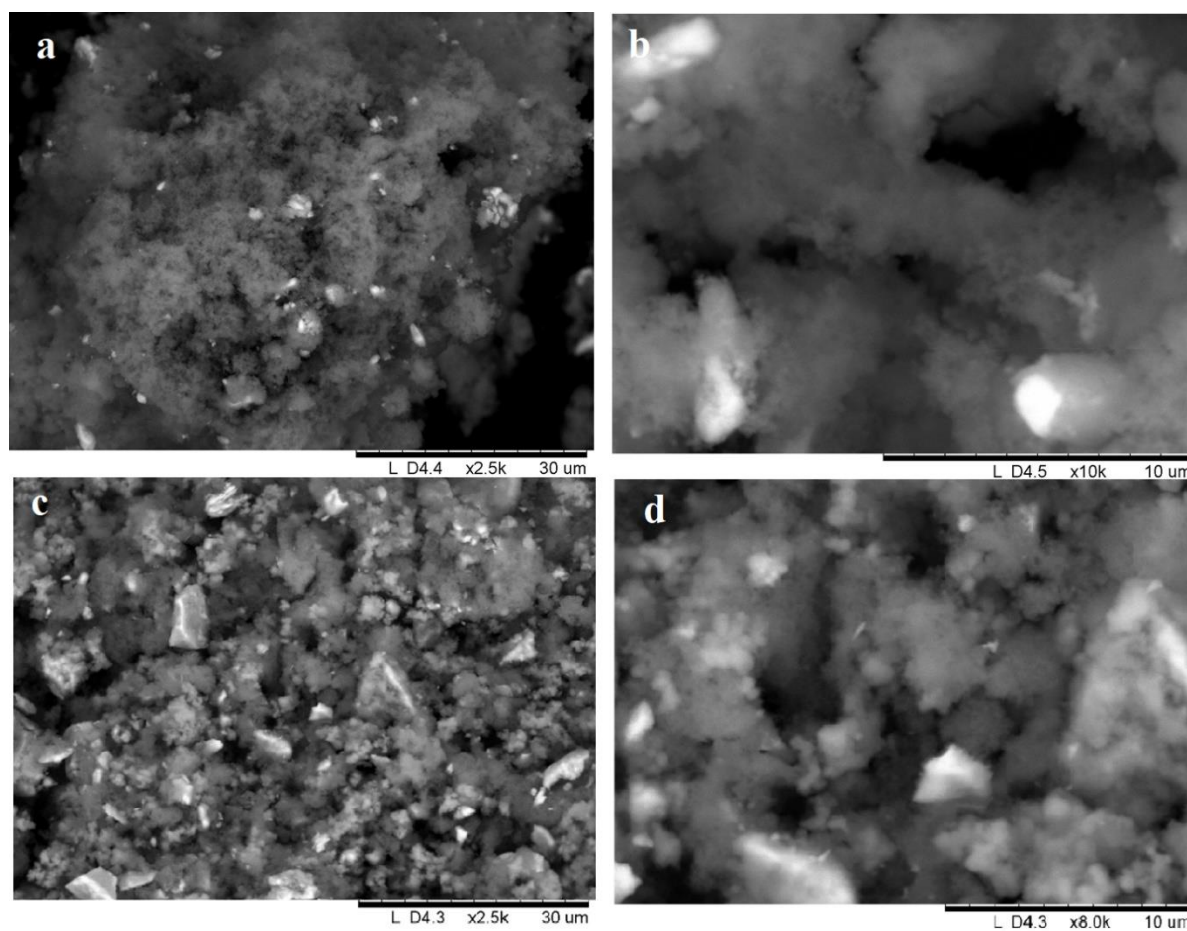

**Figure S1.** SEM images of sol gel encapsulated HRP (a,b) and LiP (c,d) composite samples.

**Thermogravimetric analysis.**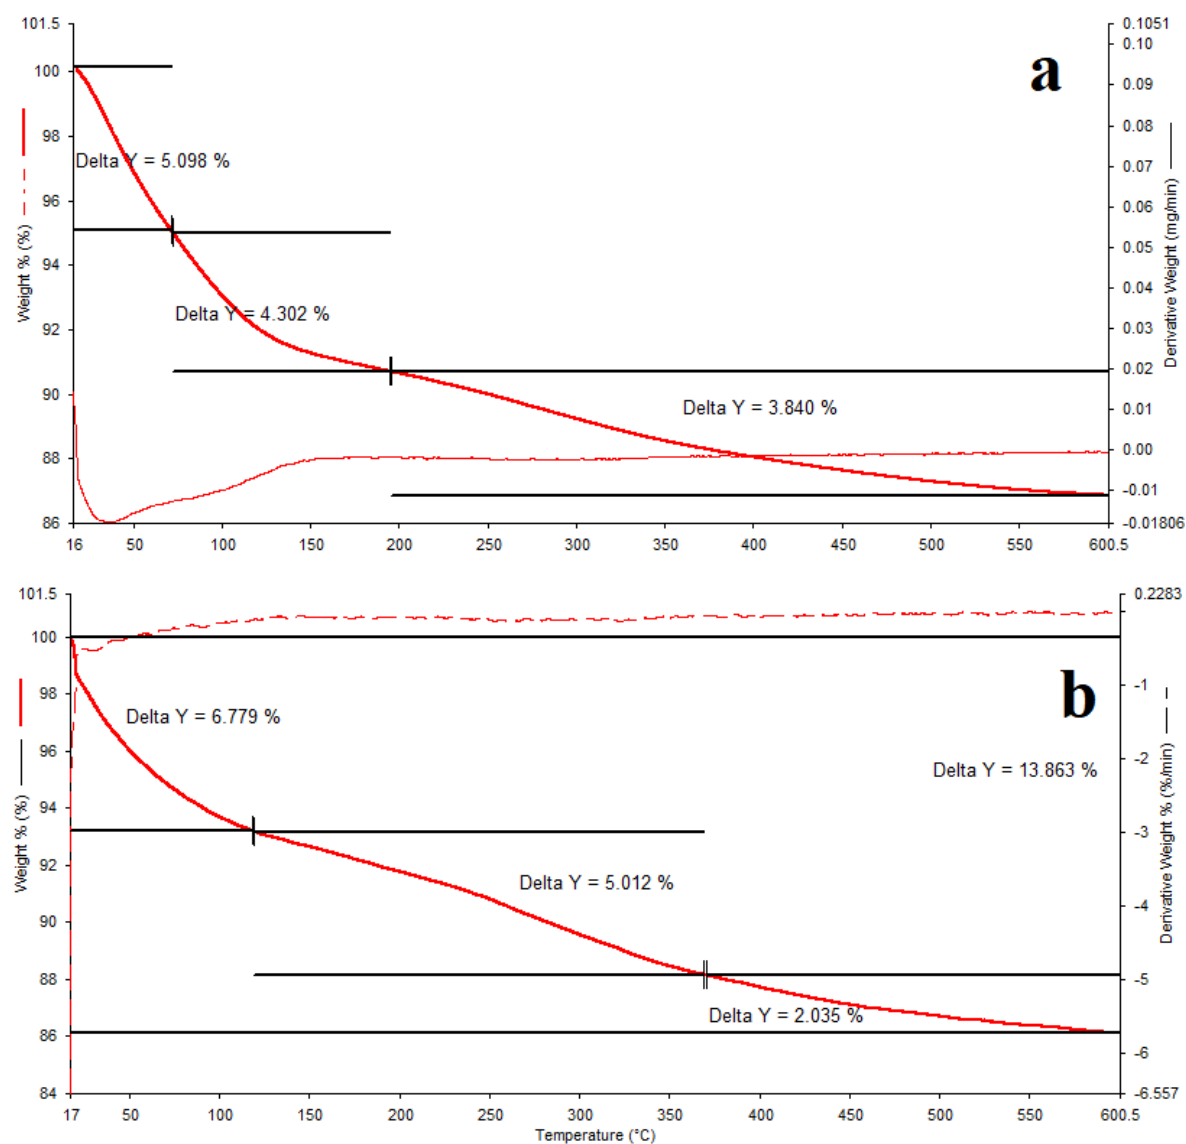

**Figure S2.** TGA of freeze-dried HRP sample (a) and LiP sample (b).

**FTIR.**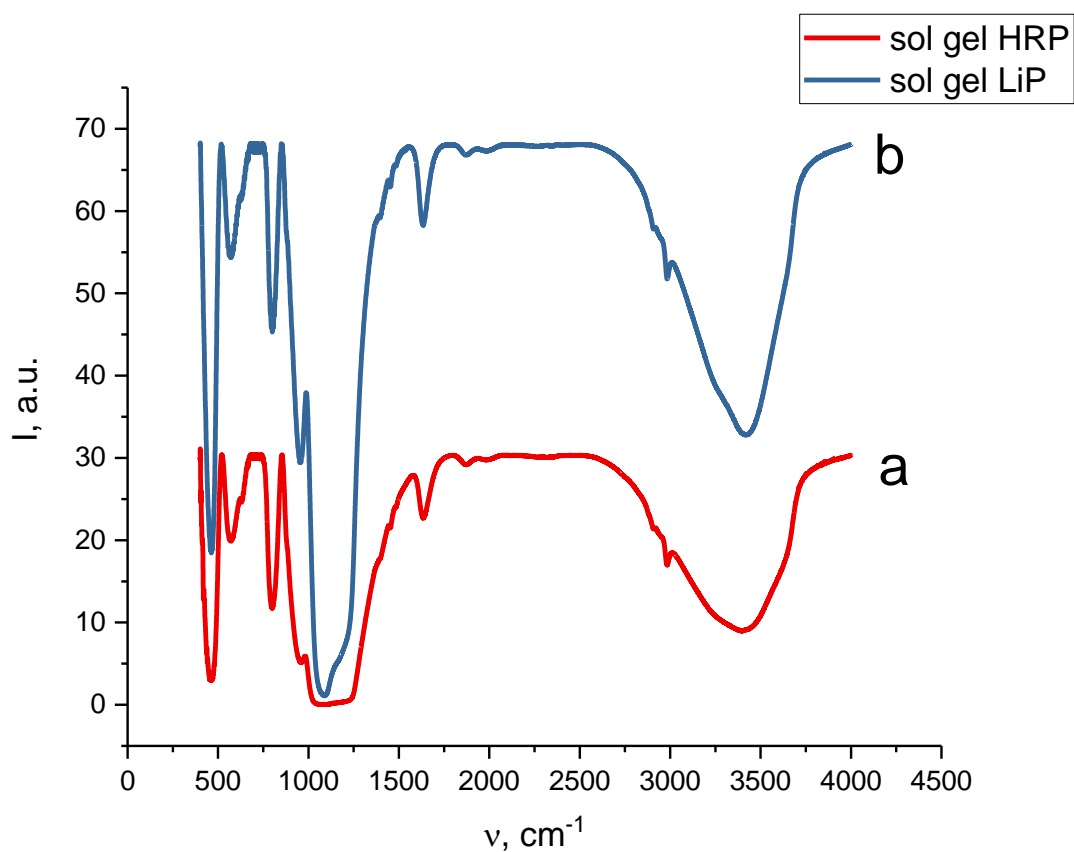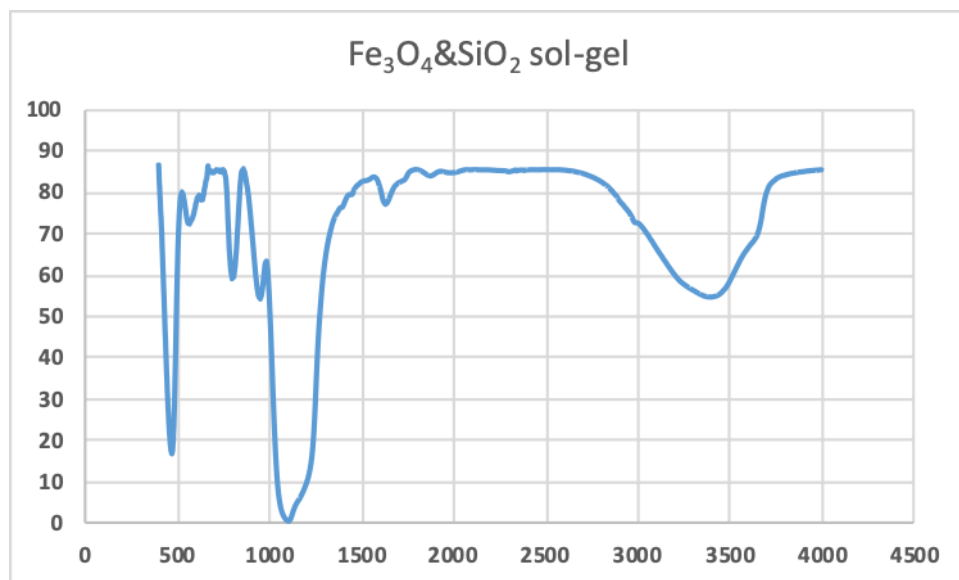

**Figure S3.** FTIR spectra of the sol gel HRP (a) and sol gel LiP (b) composite samples and enzyme-free sol-gel silica (c). It has to be noted that the spectra are identical, showing only characteristic bands of sol-gel silica.

**Assignments for FTIR below.**

- 472 vs  $\delta$  (Si-O-Si)
- 806 s  $\nu$  (Si-O)
- 952 s  $\nu$  (Si-OH)

1117-1230 vvs  $\nu$  (Si-O-Si)  
 1637 w  $\delta$  (O-H) in Si-OH  
 1735 sh  $\delta$  (OH) adsorbed water  
 3000 w, sharp  $\nu$  (O-H) from Fe-OH  
 3417 s br  $\nu$  (O-H) from Si-OH  
 3636 sh  $\nu$  (O-H) adsorbed water

## NMR.

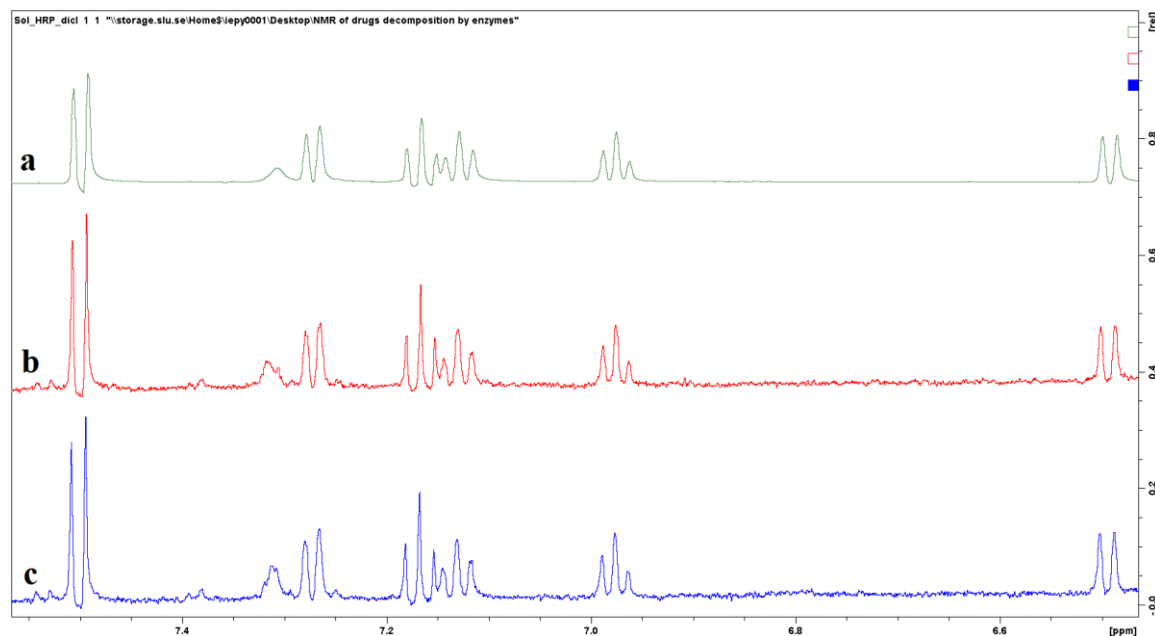

**Figure S4.** NMR spectra of initial diclofenac (a), diclofenac after interaction with sol gel encapsulated LiP (b), and HRP (c) composites at pH=5 during 3 days.

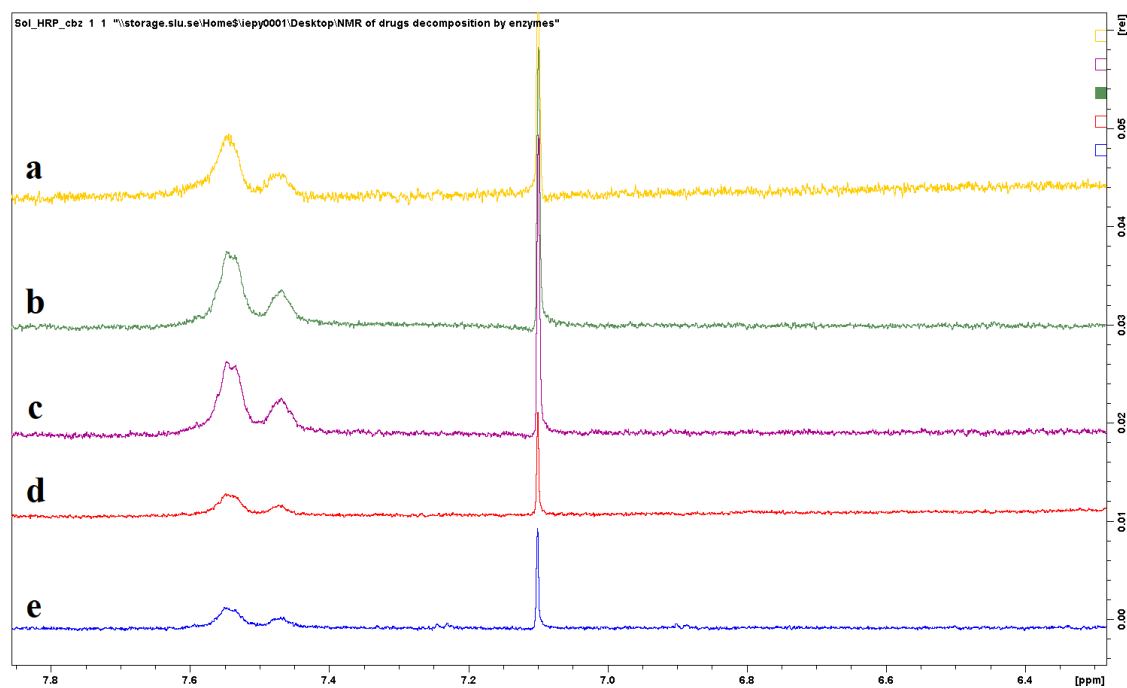

**Figure S5.** NMR spectra of initial carbamazepine (a), CBZ after interaction with native LiP enzyme (b), HRP enzyme (c), at pH=7 during 5 days, and CBZ after contact with sol gel encapsulated LiP (d) and HRP (e) at pH=5.

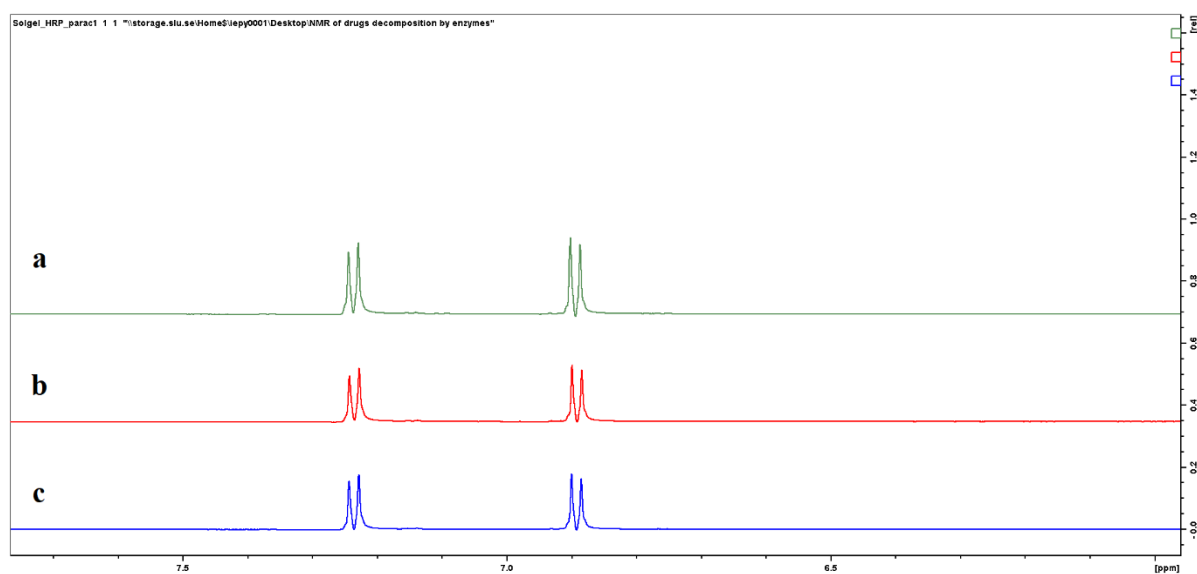

**Figure S6.** NMR spectra initial paracetamol (a), paracetamol after interaction with sol gel HRP (b) and LiP (c) composites at pH=5.

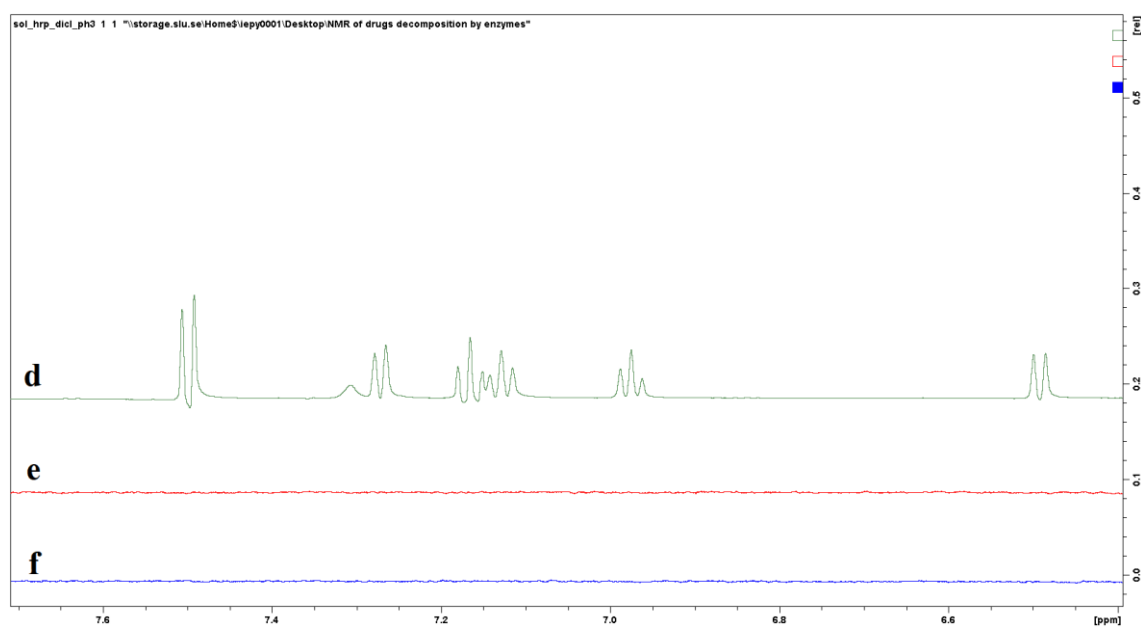

**Figure S7.** NMR spectra of initial diclofenac (d), diclofenac after interaction with sol gel encapsulated LiP (e), HRP (f) composites at pH=3 during 3 days.

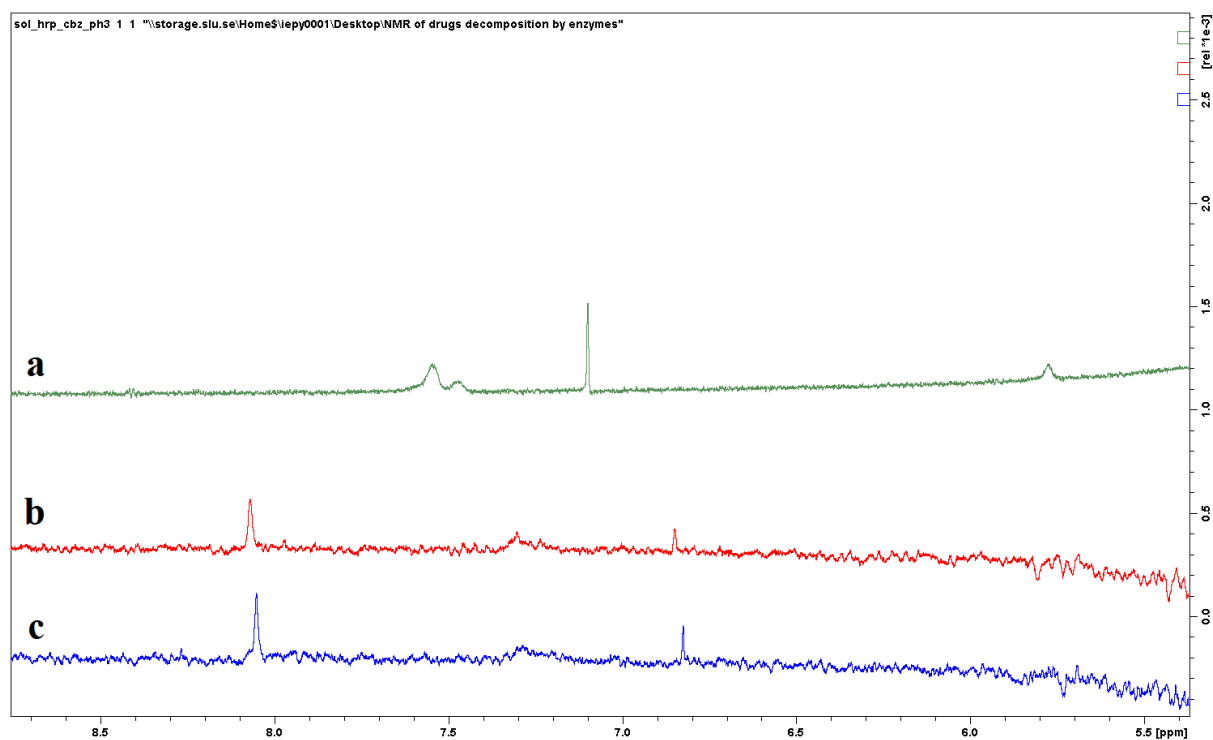

**Figure S8.** NMR spectra of initial CBZ (a), CBZ after interaction with sol gel encapsulated LiP (b), and HRP (c) at pH=3 during 3 days.

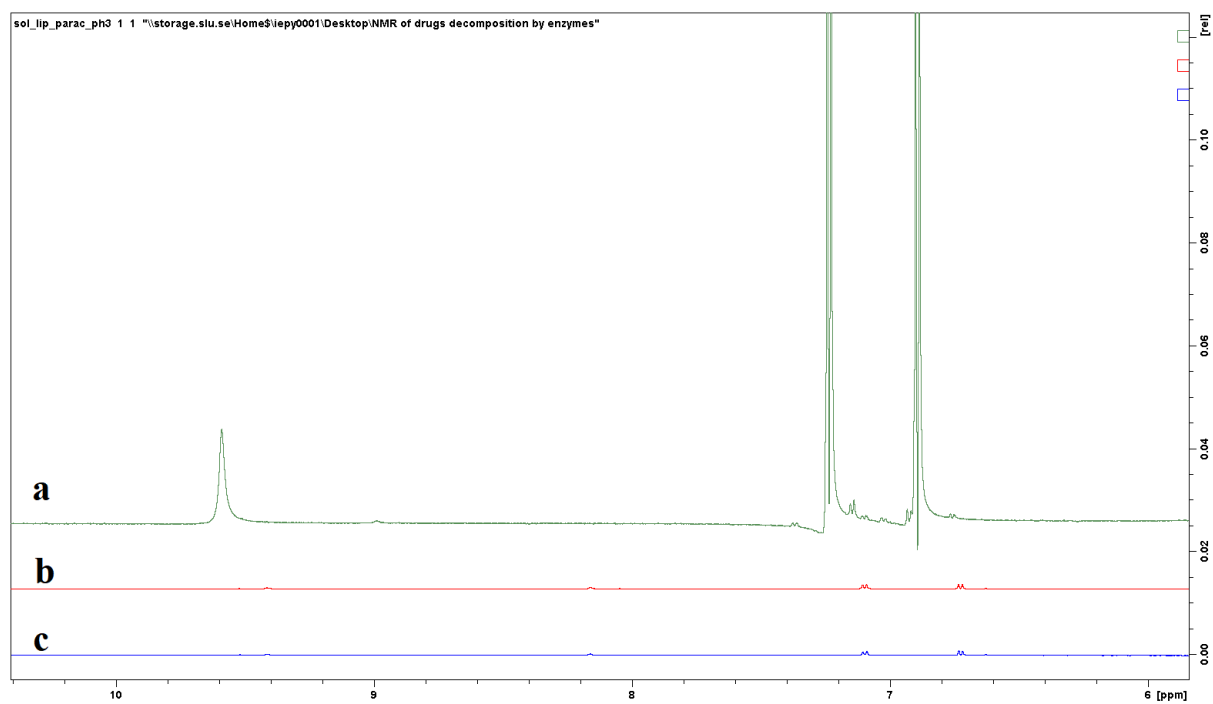

**Figure S9.** NMR spectra initial paracetamol (a), paracetamol after interaction with sol gel HRP (b) and LiP (c) composites at pH=3.

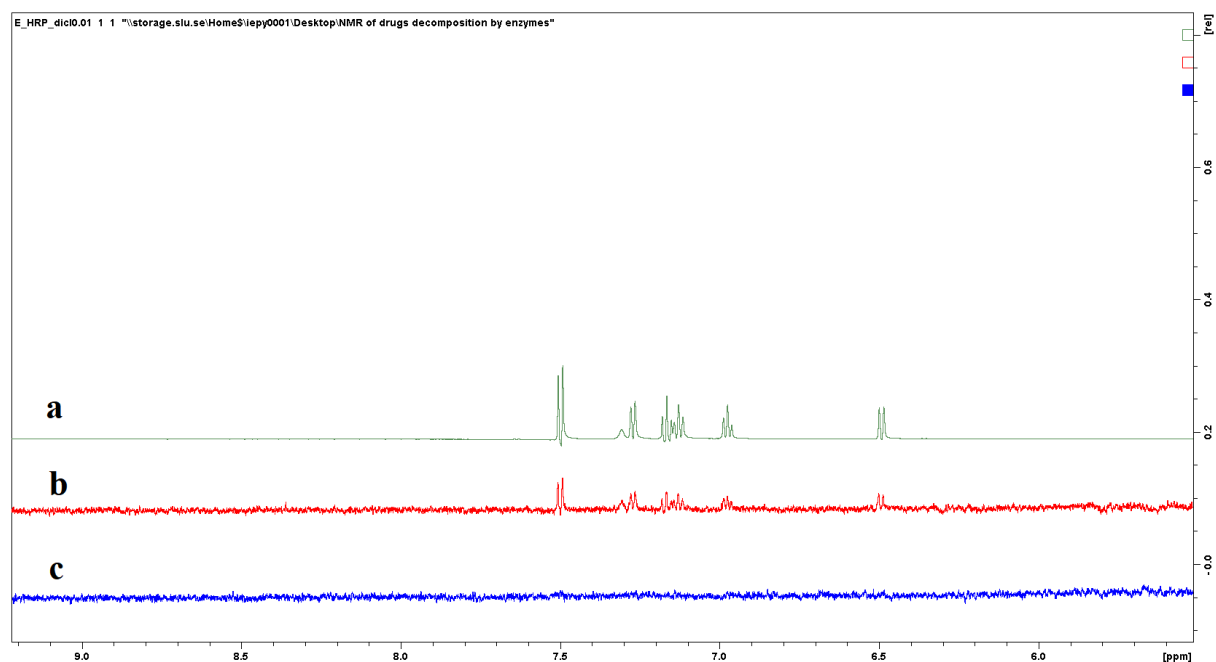

**Figure S10.** NMR spectra of diclofenac (a), diclofenac after interaction with native LiP (b) and HRP (c) enzymes during at pH=7 during 5 days.

#### AFM data.

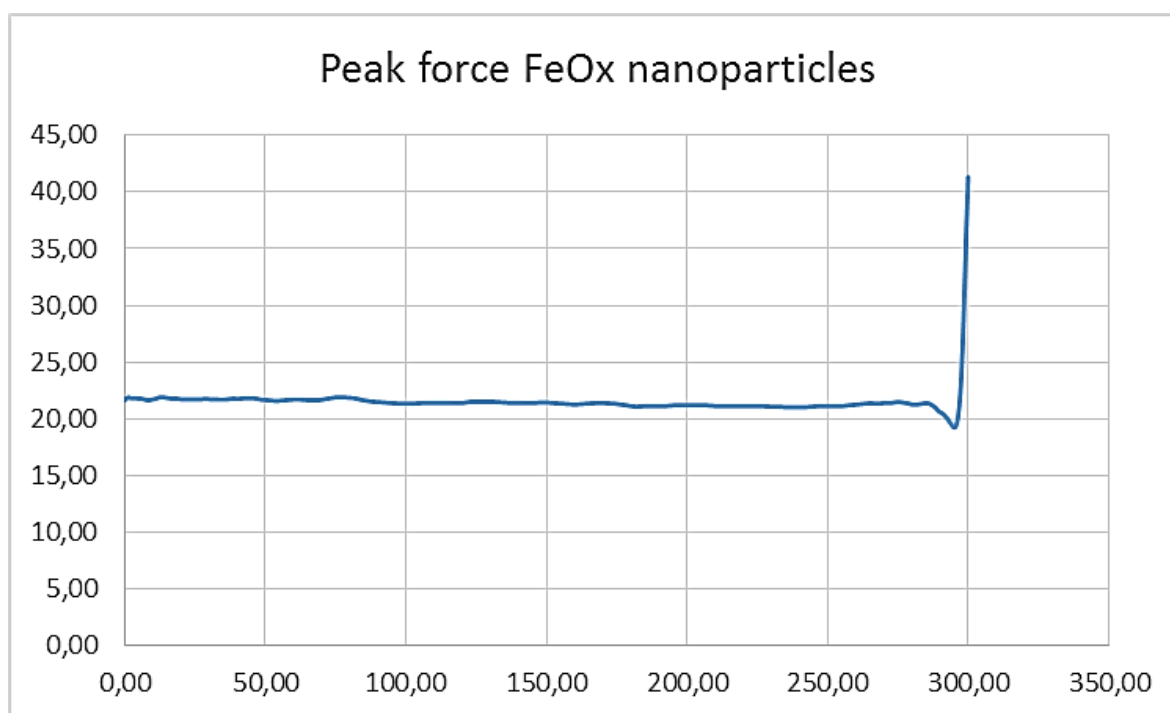



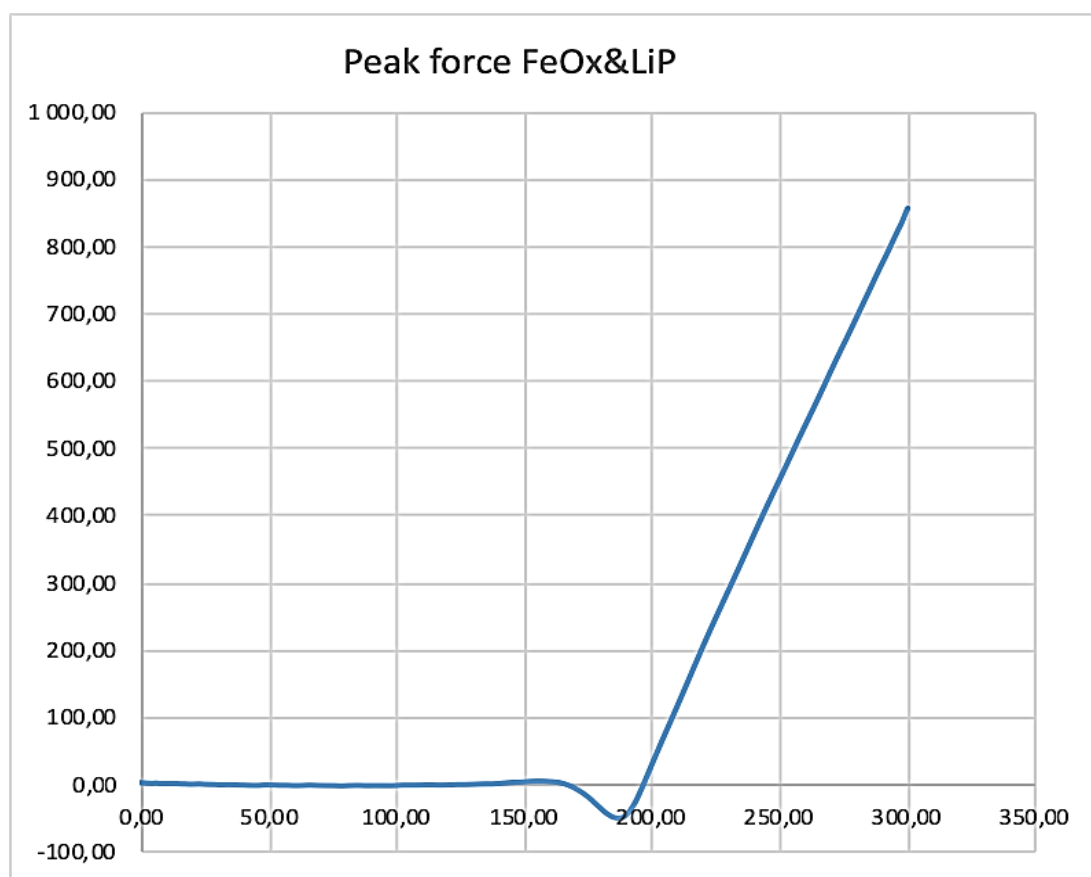

**Figure S12.** Representative image of a peak force curve for the LiP coated iron oxide particle.

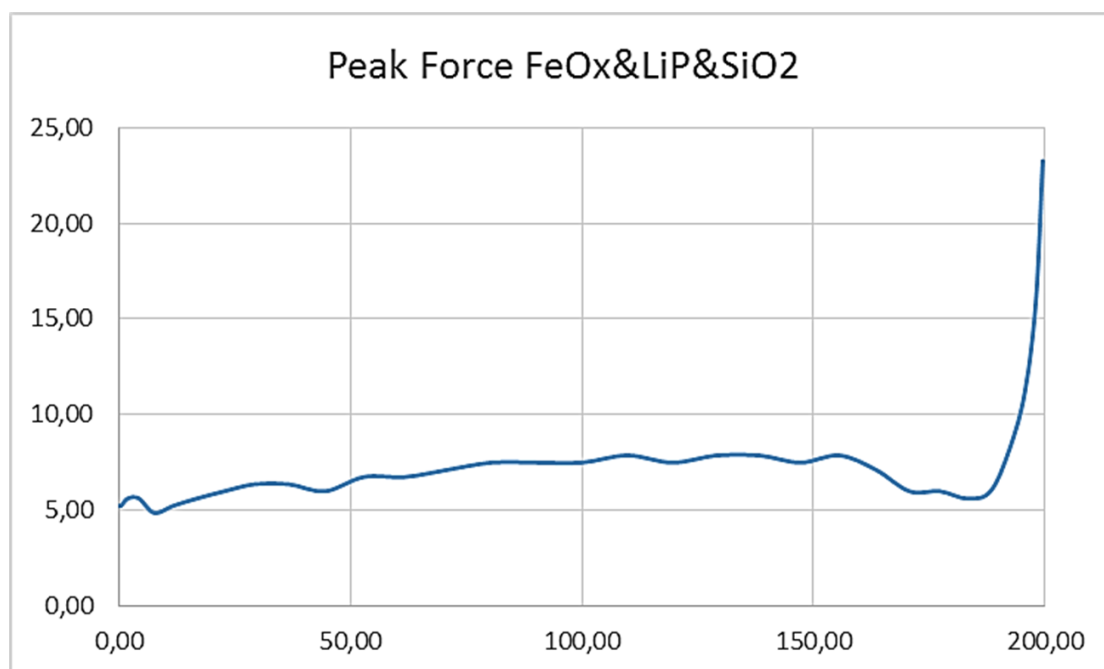

**Figure S13.** Representative image of a peak force curve for the silica-coated LiP-bearing iron oxide particles.

**Differential scanning calorimetry.**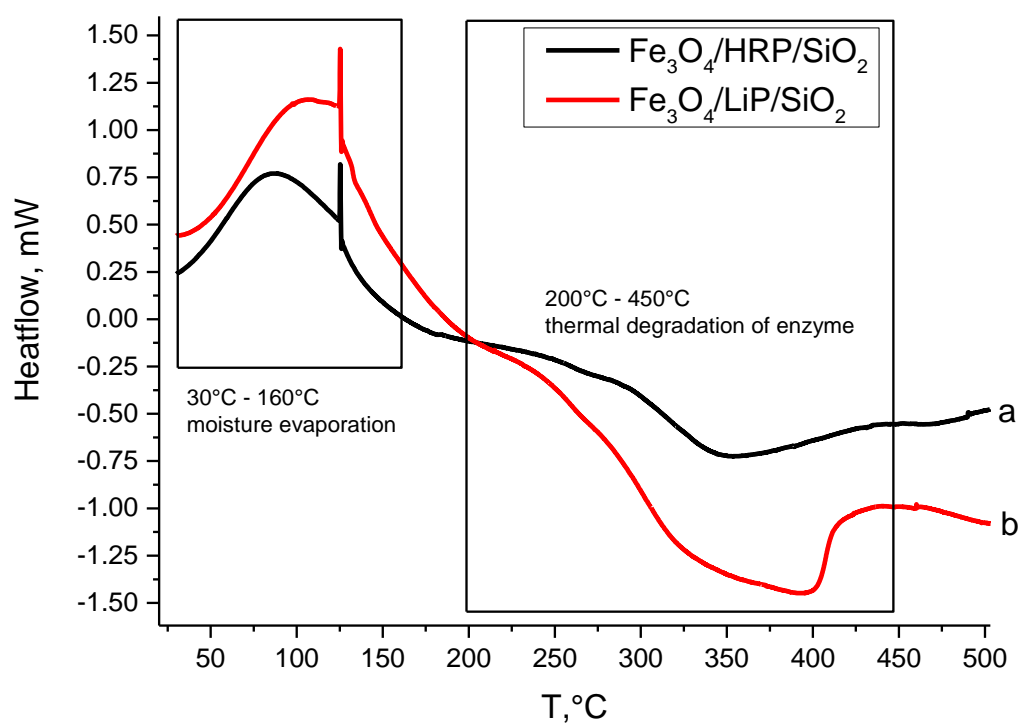

**Figure S14.** DSC data for  $\text{Fe}_3\text{O}_4/\text{HRP}/\text{SiO}_2$  (a) and  $\text{Fe}_3\text{O}_4/\text{LiP}/\text{SiO}_2$  composites (b).

### Drugs degradation by non-encapsulated enzymes.

Experiments were done with- and without enzymes; experiments were multiplied and ran in a few cycles.

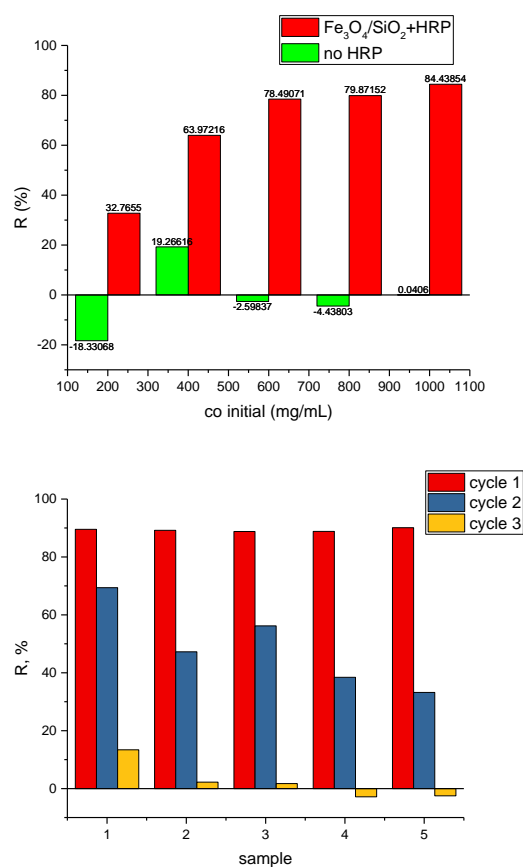

Figure S15. Paracetamol degradation non-encapsulated HRP, pH=7 (t=18 h, C=1 mg/ml).

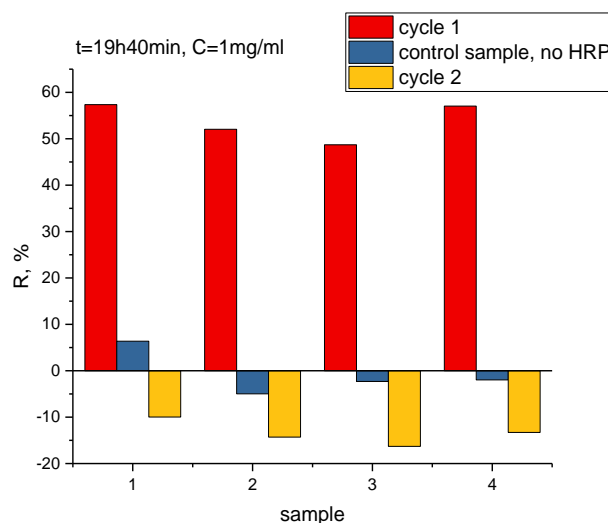

Figure S16. Diclofenac degradation non-encapsulated HRP, pH=7 (t=19h40 min, C=1mg/ml).

### Enzyme leaching from sol gel encapsulated composites.

Enzyme leakage tests, were performed using both UV-Vis at  $\lambda = 280$  nm to detect enzyme, and to evaluate possible enzymatic activity of leachate (ABTS,  $\lambda = 420$  nm). Tests were performed as following. 30 mg of sample has been shaking at 55 °C for 24 h in deionized water. After composite decantation by magnet, solutions were filtered through 200  $\mu$ m membrane filter and measured by UV-Vis at  $\lambda = 280$  nm. Then, ABTS was added and solution was kept for 24 h at 55 °C to react. Activity was measured at  $\lambda = 420$  nm. In total, 12 measurements were done. Data is shown below.

Normalized optical density shown in negative values for better representation.

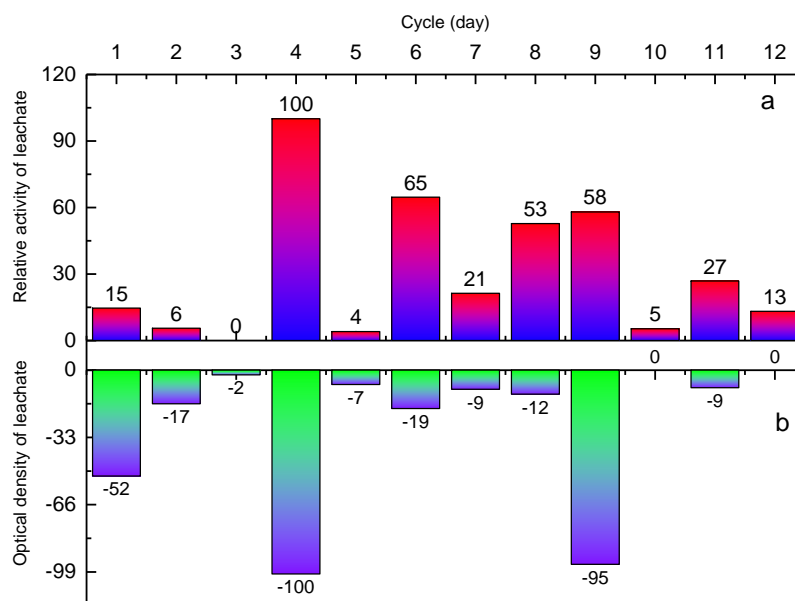

**Figure S17.** Normalized enzyme activity of leachate solution (a) and optical density of leachate solution (b) for  $\text{Fe}_3\text{O}_4/\text{HRP}/\text{SiO}_2$  composite.

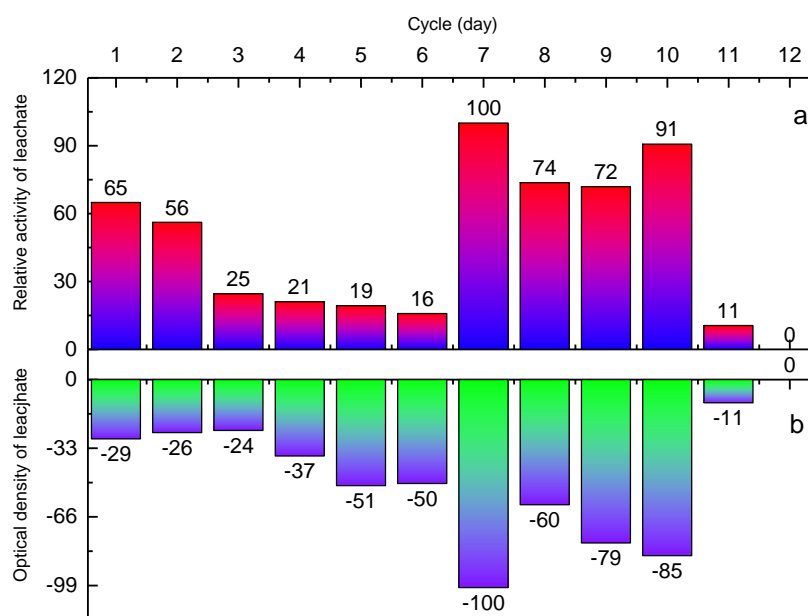

**Figure S18.** Normalized enzymatic activity of leachate solution (a) and optical density of leachate solution (b) for LiP composites.
